# Supplementary material for: Analysis of polycyclic aromatic hydrocarbons using porous material MCM-41 as a sorbent
Source: Royal Society of Chemistry journal article supplement (doi:10.1039/c3ay41172a), 2013-01-01
Supplement: c3ay41172a.pdf [file c3ay41172a.pdf]

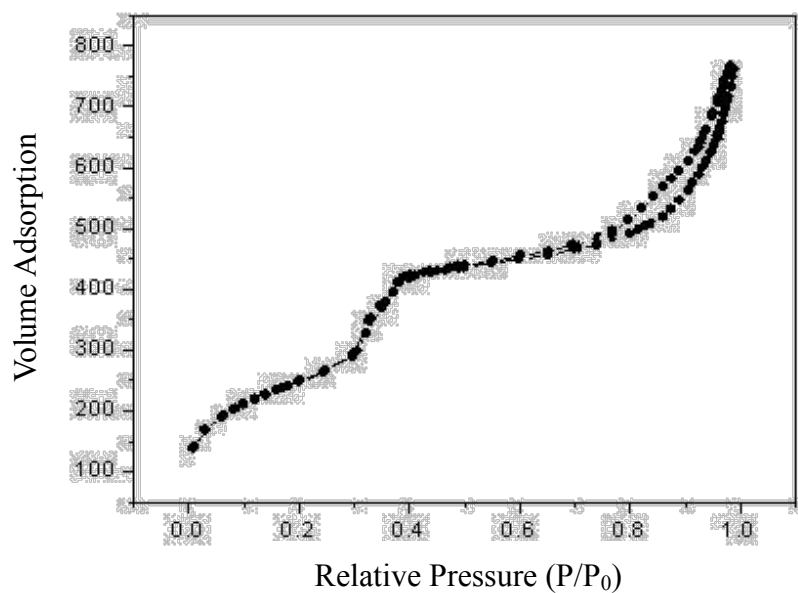

**Figure S1.** N<sub>2</sub> adsorption–desorption isotherm of the synthesized MCM-41 obtained at 77 K.

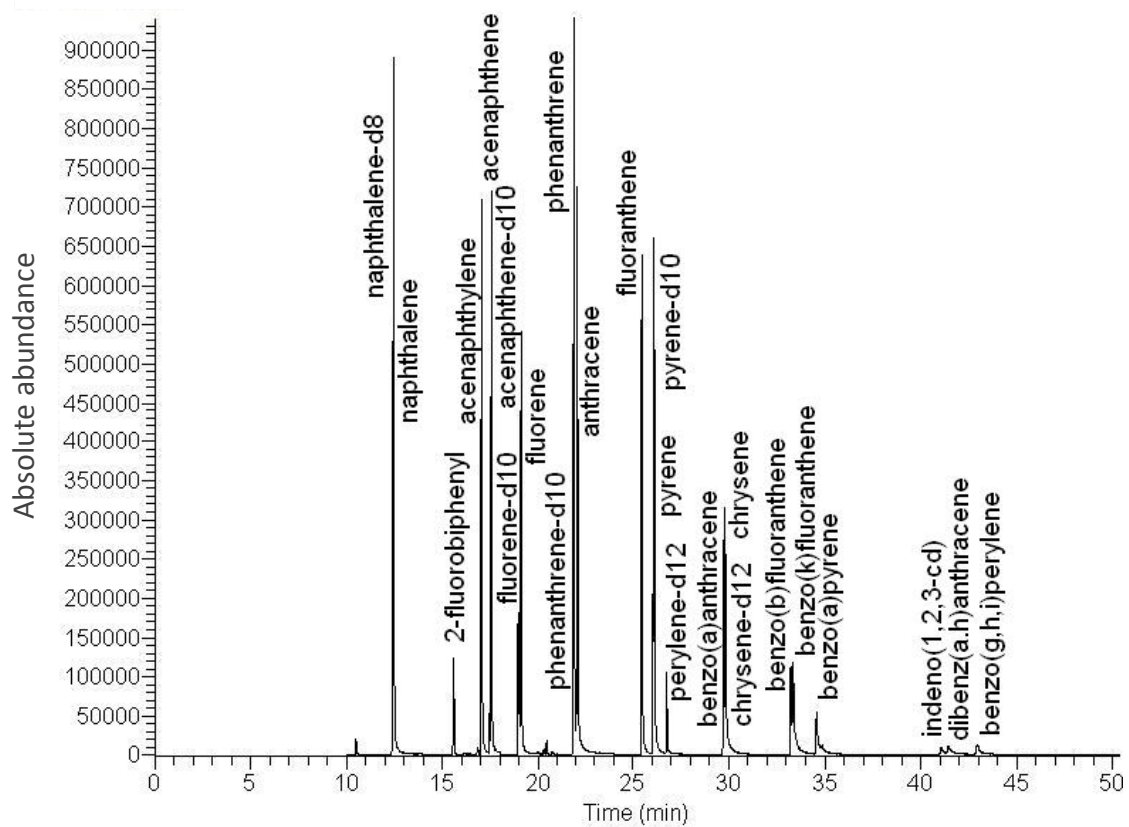

**Figure S2.** GC/MS chromatogram of the PAH external standard.

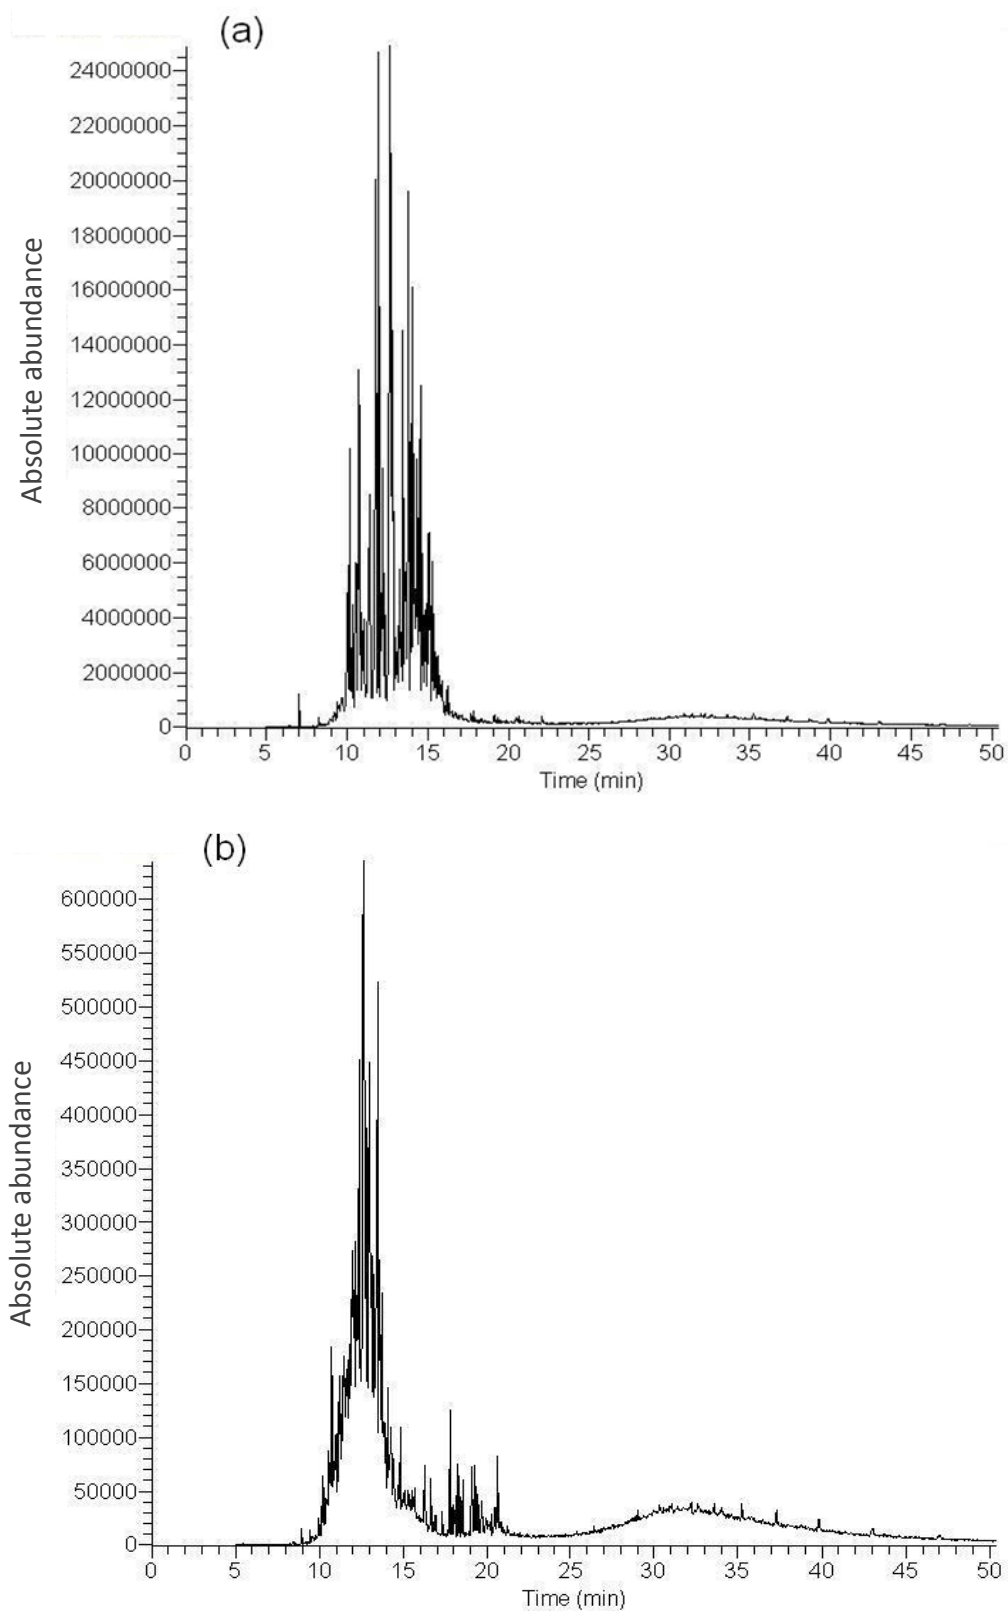

**Figure S3.** Two-stroke motorcycle exhaust sampled by XAD-2 in (a) TIC mode and (b) SIM mode.

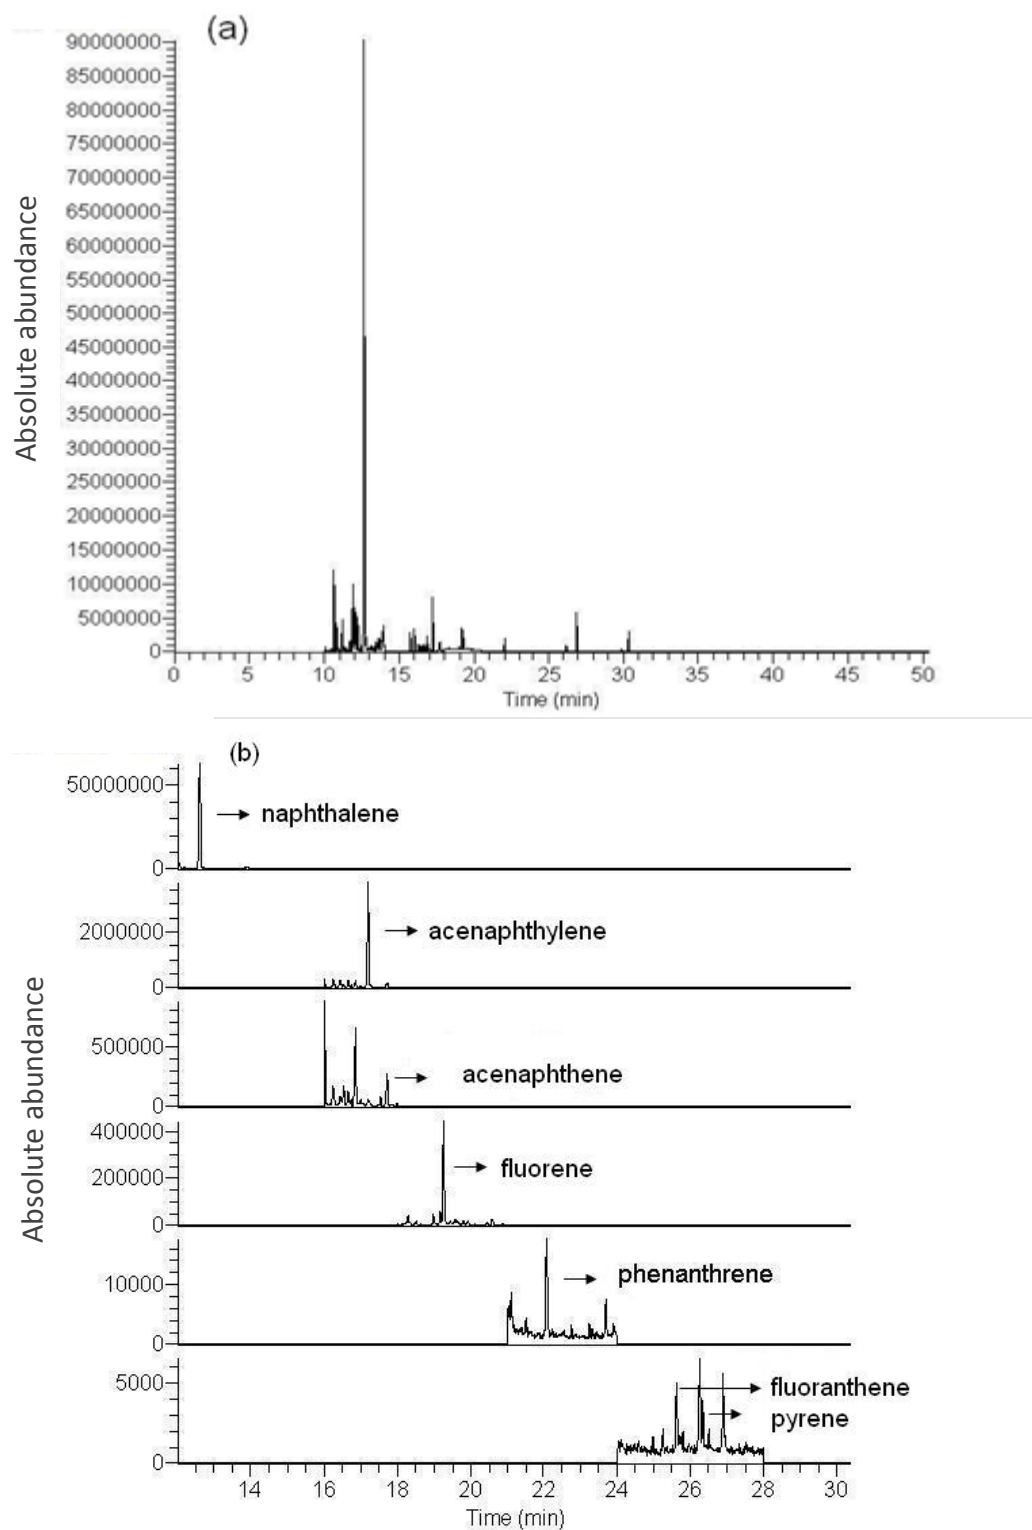

**Figure S4.** Four-stroke motorcycle exhaust sampled by XAD-2 in (a) TIC mode and (b) SIM mode for the seven target PAHs.

## Appendix

The recovery of each target PAH and surrogate was calculated using the following equation:

$$R_s = \frac{A_s \times Q_{is}}{A_{is} \times \overline{RRF}_s \times Q_s} \times 100\%$$

where

$A_s$  is the area of the primary quantitation ion for the target PAH or surrogate;

$A_{is}$  is the area of the primary quantitation ion for the internal standard;

$Q_s$  is the amount of the target PAH or surrogate, in ng;

$Q_{is}$  is the amount of the internal standard, in ng; and

$\overline{RRF}_s$  is the mean RRF for the target PAH.

The mean RRF for each unlabeled target PAH, surrogate standard, and internal standard is calculated as follows:

$$\overline{RRF} = \frac{1}{n} \sum_{i=1}^n (RRF)_i$$

where

$(RRF)_i$  is the RRF calculated for solution “ $i$ ”, and

$n$  is the number of data points derived from the reproducibility test.
